# Supplementary material
Source: publisher figshare collection journal article supplement (https://frontiersin.figshare.com/ndownloader/files/12480131)
Supplement: Supplementary file [file 12480131]

**Table S2**

Rate reaction laws

| Reaction                                                        | Equation                                                                                                                                                  | Kinetic rate law              |
|-----------------------------------------------------------------|-----------------------------------------------------------------------------------------------------------------------------------------------------------|-------------------------------|
| ComAB synthesis                                                 | $\beta_{ComAB} + v_{max_{ComAB}} \frac{[(ComE \sim P)_D]}{[(ComE \sim P)_D] + K_{ComE \sim P_{AB}} * \left(1 + \frac{[ComE]^e}{Ki_{ComE_{AB}}^e}\right)}$ | Competitive inhibition        |
| ComAB degradation                                               | $\gamma_{ComAB} * [ComAB]$                                                                                                                                | Mass action                   |
| pre-CSP synthesis                                               | $\beta_{ComCDE} + v_{max_{ComCDE}} \frac{[(ComE \sim P)_D]}{[(ComE \sim P)_D] + K_{ComE \sim P} * \left(1 + \frac{[ComE]^e}{Ki_{ComE}^e}\right)}$         | Competitive inhibition        |
| pre-CSP maturation and CSP export                               | $\varepsilon * [ComAB] * [preCSP]$                                                                                                                        | Mass action                   |
| pre-CSP degradation                                             | $\gamma_{preCSP} * [preCSP]$                                                                                                                              | Mass action                   |
| CSP degradation                                                 | $\gamma_{CSP} * [CSP]$                                                                                                                                    | Mass action                   |
| ComE synthesis                                                  | $\beta_{ComCDE} + v_{max_{ComCDE}} \frac{[(ComE \sim P)_D]}{[(ComE \sim P)_D] + K_{ComE \sim P} * \left(1 + \frac{[ComE]^e}{Ki_{ComE}^e}\right)}$         | Competitive inhibition        |
| ComE degradation                                                | $\gamma_{ComE} * [ComE]$                                                                                                                                  | Mass action                   |
| ComD synthesis                                                  | $\beta_{ComCDE} + v_{max_{ComCDE}} \frac{[(ComE \sim P)_D]}{[(ComE \sim P)_D] + K_{ComE \sim P} * \left(1 + \frac{[ComE]^e}{Ki_{ComE}^e}\right)}$         | Competitive inhibition        |
| Dimerization of ComD                                            | $k_{on\_D} * [ComD]^2$                                                                                                                                    | Mass action                   |
| ComD dimer dissociation                                         | $k_{off\_D} * [(ComD)_D]$                                                                                                                                 | Mass action                   |
| Basal autophosphorylation of ComD                               | $\alpha_{auto} * [(ComD)_D]$                                                                                                                              | Mass action                   |
| CSP-induced autophosphorylation of ComD                         | $v_{max_{act}} * \frac{[CSP]}{[CSP] + K_{act}} * [(ComD)_D]$                                                                                              | Michaelis-Menten              |
| ComD degradation                                                | $\gamma_{ComD} * [ComD]$                                                                                                                                  | Mass action                   |
| Degradation of the inactive form of the CSP-bound dimer of ComD | $\gamma_{ComD} * [(ComD_{consumed})_D]$                                                                                                                   | Mass action                   |
| ComE transphosphorylation                                       | $\lambda * [ComE]^2 * [(ComD_{act})_D]$                                                                                                                   | Mass action                   |
| ComE~P dephosphorylation                                        | $\rho * [(ComE \sim P)_D]$                                                                                                                                | Mass action                   |
| ComX synthesis as an inactive form                              | $v_{max_{ComX}} * \frac{[(ComE \sim P)_D]^x}{[(ComE \sim P)_D]^x + K_{ComX}^x}$                                                                           | Hill function (cooperativity) |
| ComW synthesis                                                  | $v_{max_{ComW}} * \frac{[(ComE \sim P)_D]^w}{[(ComE \sim P)_D]^w + K_{ComW}^w}$                                                                           | Hill function (cooperativity) |
| ComX activation                                                 | $\omega_1 * [ComW] * [ComX_{ina}]$                                                                                                                        | Mass action                   |
| ComW degradation                                                | $\gamma_{ComW} * [ComW]$                                                                                                                                  | Mass action                   |
| Inactive form of ComX degradation                               | $\gamma_{ComX} * [ComX_{ina}]$                                                                                                                            | Mass action                   |
| Active form of ComX degradation                                 | $\gamma_{ComX} * [ComX_{act}]$                                                                                                                            | Mass action                   |
| SsbB synthesis                                                  | $v_{max_{SsbB}} * \frac{[ComX_{act}]^s}{[ComX_{act}]^s + K_{SsbB}^s}$                                                                                     | Hill function (cooperativity) |
| SsbB degradation                                                | $\gamma_{SsbB} * [SsbB]$                                                                                                                                  | Mass action                   |
| DprA synthesis                                                  | $v_{max_{DprA}} * \frac{[ComX_{act}]^d}{[ComX_{act}]^d + K_{DprA}^d}$                                                                                     | Hill function (cooperativity) |
| DprA degradation                                                | $\gamma_{DprA} * [DprA]$                                                                                                                                  | Mass action                   |
| Formation of the DprA-ComE~P complex                            | $2 * k_{on\_DprA\_EP} * [DprA]^2 * [(ComE \sim P)_D]$                                                                                                     | Mass action                   |
| Degradation of the DprA-ComE~P complex                          | $\gamma_{DprA} * [(DprA\_ComE \sim P)_D]$                                                                                                                 | Mass action                   |
| ComZ synthesis                                                  | $v_{max_{ComZ}} * \frac{[ComX_{act}]^z}{[ComX_{act}]^z + K_{ComZ}^z}$                                                                                     | Hill function (cooperativity) |
| ComZ degradation                                                | $\gamma_{ComZ} * [ComZ]$                                                                                                                                  | Mass action                   |
| ComZ and ComW interaction                                       | $\omega_2 * [ComZ] * [ComW_{act}]$                                                                                                                        | Mass action                   |
